# Supplementary material for: Epigenome-Wide Association Analysis of Differentially Methylated Signals in Blood Samples of Patients with Non-Small-Cell Lung Cancer
Source: MDPI journal article supplement (doi:10.3390/jcm8091307), 2019-08-25
Supplement: s1 [file s1]

**Table S1.** Probe-filtering criteria and summary of the 860k array.

Of the 866,277 CpGs, 695,162 were used for the epigenome-wide association analysis of non-small-cell lung cancer (NSCLC) in our study.

| Filtering criteria                                                                                                                                     | CpGs in each criterion | CpGs left in each step |
|--------------------------------------------------------------------------------------------------------------------------------------------------------|------------------------|------------------------|
| Total CpGs in the 850k array                                                                                                                           | —                      | 866,277                |
| Probes with a detection $p$ -value of $>0.01$ in one or more samples                                                                                   | 26,884                 | 839,393                |
| Probes with a bead count of $<3$ in $\geq 1\%$ of the samples                                                                                          | 14,454                 | 824,939                |
| Probes on the X or Y chromosome                                                                                                                        | 17,717                 | 807,222                |
| Probes with SNPs                                                                                                                                       | 7,562                  | 799,660                |
| Probes that align to multiple locations                                                                                                                | 40,832                 | 758,828                |
| Probes overlapping genetic variants at single-base extension sites for Infinium Type I probes                                                          | 3                      | 758,825                |
| Probes with genetic variants overlapping the body of the probe: 48 base pairs for Infinium Type I probes and 49 base pairs for Infinium Type II probes | 63,663                 | 695,162                |

CpG: cytosine-phosphate-guanine; SNP: single-nucleotide polymorphism.

**Table S2.** Differentially methylated probes (DMPs), suggestive of an association with NSCLC.  
(Listed here are 11 CpGs with unadjusted  $p < 1.0E-5$ .)

| Target ID  | Chr <sup>a</sup> | Position  | Gene ID        | Location | Beta <sup>b</sup> | Beta (SE) | <i>p</i> -value <sup>c</sup> (adjusted) |
|------------|------------------|-----------|----------------|----------|-------------------|-----------|-----------------------------------------|
| cg14988239 | 7                | 23349179  | C7orf30        | 3'UTR    | -125.782          | 27.898    | 1.5E-06                                 |
| cg14887853 | 6                | 139794538 | LOC645434      | Body     | 11.052            | 2.486     | 1.7E-06                                 |
| cg02357336 | 1                | 87617142  | LOC339524      | Body     | 26.903            | 5.982     | 1.9E-06                                 |
| cg05547853 | 5                | 180236251 | MGAT1          | 5'UTR    | 15.296            | 3.414     | 2.1E-06                                 |
| cg19139343 | 3                | 97466366  | EPHA6          | Body     | 16.222            | 3.641     | 2.4E-06                                 |
| cg18339470 | 2                | 228211432 | MFF            | Body     | 29.836            | 6.732     | 3.1E-06                                 |
| cg03220797 | 22               | 25506763  | KIAA1671       | Body     | -157.885          | 36.268    | 4.5E-06                                 |
| cg06141624 | 12               | 24716590  | SOX5           | TSS1500  | 71.804            | 16.779    | 5.4E-06                                 |
| cg24468682 | 9                | 35690928  | TPM2           | TSS1500  | -571.872          | 134.670   | 7.9E-06                                 |
| cg04497719 | 6                | 7961211   | BLOC1S5-TXNDC5 | Body     | -11.021           | 2.611     | 8.4E-06                                 |
| cg02590940 | 4                | 52709001  | DCUN1D4        | TSS1500  | 147.790           | 34.829    | 8.4E-06                                 |

<sup>a</sup>Chromosome. <sup>b</sup>Regression coefficient from the statistical models. The covariates age, sex, principal component analysis (PCA), smoking (pack-years), and estimated cell-type proportions were included in the models. Methylation (beta) ranged between 0 and 1 in the analyses. <sup>c</sup>Statistical significance from the statistical model.

**Table S3.** DMPs, suggestive of an association with NSCLC in current smokers.  
(Listed here are 58 CpGs with unadjusted  $p < 1.0E-5$ .)

| Target ID  | Chr <sup>a</sup> | Position  | Gene ID      | Location | Beta <sup>b</sup> | Beta (SE) | <i>p</i> -value <sup>c</sup> (adjusted) |
|------------|------------------|-----------|--------------|----------|-------------------|-----------|-----------------------------------------|
| cg17970341 | 11               | 68139725  | LRP5         | Body     | -57.168           | 13.400    | 1.6E-07                                 |
| cg07900121 | 6                | 12539180  | —            | —        | -63.796           | 15.465    | 2.8E-07                                 |
| cg18437361 | 16               | 20778121  | ACSM3        | 5'UTR    | -559.210          | 140.060   | 3.0E-07                                 |
| cg15571933 | 22               | 19186646  | CLTCL1       | Body     | 60.071            | 14.396    | 3.4E-07                                 |
| cg12662072 | 5                | 63986793  | FAM159B      | Body     | 138.297           | 34.848    | 3.4E-07                                 |
| cg19821713 | 15               | 96909816  | —            | —        | 79.180            | 19.900    | 5.7E-07                                 |
| cg09186006 | 10               | 91295299  | SLC16A12     | 1stExon  | 115.235           | 29.579    | 8.7E-07                                 |
| cg22911013 | 3                | 119832292 | —            | —        | -160.392          | 39.475    | 8.7E-07                                 |
| cg03624135 | 20               | 9486968   | —            | —        | 78.260            | 19.928    | 9.2E-07                                 |
| cg26203839 | 8                | 142174631 | DENND3       | Body     | -51.486           | 12.471    | 1.1E-06                                 |
| cg23526861 | 3                | 46924956  | PTH1R        | 5'UTR    | 416.820           | 106.794   | 1.1E-06                                 |
| cg09068724 | 18               | 18642613  | ROCK1        | Body     | 154.719           | 38.925    | 1.2E-06                                 |
| cg12725760 | 1                | 192873912 | —            | —        | 22.870            | 5.761     | 1.4E-06                                 |
| cg14453327 | 7                | 104845051 | SRPK2        | Body     | -365.463          | 92.396    | 1.6E-06                                 |
| cg25947890 | 9                | 139403372 | NOTCH1       | Body     | -61.560           | 15.947    | 1.7E-06                                 |
| cg00353531 | 9                | 93805672  | —            | —        | 57.619            | 14.576    | 1.8E-06                                 |
| cg16032065 | 9                | 120993167 | —            | —        | -26.422           | 6.626     | 1.8E-06                                 |
| cg15512166 | 5                | 179544005 | RASGEF1C     | Body     | 53.703            | 13.898    | 2.1E-06                                 |
| cg05366909 | 11               | 125333752 | FEZ1         | Body     | -56.155           | 14.523    | 2.1E-06                                 |
| cg27176357 | 19               | 57702500  | ZNF264       | TSS1500  | 23.183            | 5.996     | 2.4E-06                                 |
| cg17186373 | 8                | 74884456  | TCEB1        | TSS200   | -694.001          | 172.515   | 2.6E-06                                 |
| cg01881064 | 1                | 54396087  | HSPB11       | Body     | -403.460          | 101.755   | 2.7E-06                                 |
| cg14430698 | 2                | 131482665 | —            | —        | -51.301           | 12.679    | 2.7E-06                                 |
| cg11074192 | 13               | 78494442  | EDNRB        | TSS1500  | 317.094           | 83.841    | 2.8E-06                                 |
| cg05478330 | 15               | 78189752  | —            | —        | -105.414          | 27.167    | 2.9E-06                                 |
| cg07538771 | 5                | 77458683  | AP3B1        | Body     | -154.489          | 39.730    | 3.0E-06                                 |
| cg00521863 | 2                | 171783942 | —            | —        | 186.292           | 48.311    | 3.0E-06                                 |
| cg02642363 | 22               | 37422281  | MPST         | Body     | -225.764          | 56.457    | 3.1E-06                                 |
| cg22187630 | 19               | 13616871  | CACNA1A      | 1stExon  | 63.472            | 16.325    | 3.1E-06                                 |
| cg05425050 | 11               | 27494410  | LGR4         | TSS200   | 1,009.760         | 263.918   | 3.6E-06                                 |
| cg12080687 | 2                | 47063626  | LOC100134259 | Body     | 55.540            | 14.221    | 3.8E-06                                 |
| cg20414505 | 1                | 6061279   | —            | —        | 162.857           | 43.825    | 3.8E-06                                 |
| cg22227726 | 1                | 202939745 | —            | —        | -32.005           | 8.043     | 3.8E-06                                 |
| cg07654631 | 3                | 128295655 | LINC01565    | TSS1500  | 58.898            | 15.527    | 4.0E-06                                 |

|            |    |           |          |         |            |         |         |
|------------|----|-----------|----------|---------|------------|---------|---------|
| cg24364143 | 1  | 33005702  | ZBTB8A   | 5'UTR   | 497.461    | 133.996 | 4.2E-06 |
| cg08217716 | 10 | 102589250 | PAX2     | 3'UTR   | 314.549    | 79.506  | 4.6E-06 |
| cg24433265 | 12 | 52389247  | ACVR1B   | 3'UTR   | -55.661    | 14.121  | 4.7E-06 |
| cg11638352 | 15 | 85526469  | PDE8A    | 5'UTR   | -57.437    | 14.633  | 5.2E-06 |
| cg19834134 | 7  | 82791675  | PCLO     | 1stExon | 117.412    | 31.853  | 5.4E-06 |
| cg19668476 | 4  | 153506267 | —        | —       | -39.265    | 10.357  | 5.6E-06 |
| cg04618230 | 4  | 54677002  | —        | —       | 48.618     | 12.592  | 5.6E-06 |
| cg09146645 | 6  | 39186104  | KCNK5    | Body    | -49.755    | 12.929  | 5.6E-06 |
| cg01411440 | 17 | 7835277   | TRAPPC1  | 5'UTR   | -559.302   | 144.065 | 6.2E-06 |
| cg07523753 | 1  | 2979582   | FLJ42875 | Body    | 37.189     | 10.095  | 6.4E-06 |
| cg08115833 | 20 | 9048763   | —        | —       | 83.563     | 21.924  | 6.5E-06 |
| cg14998959 | 10 | 134564163 | INPP5A   | Body    | -477.661   | 124.111 | 7.1E-06 |
| cg09890891 | 15 | 96904723  | —        | —       | 72.062     | 18.739  | 7.4E-06 |
| cg26000663 | 11 | 26353723  | ANO3     | 1stExon | 50.896     | 13.807  | 7.8E-06 |
| cg07740710 | 16 | 660965    | RAB40C   | Body    | -81.036    | 20.848  | 7.9E-06 |
| cg09855384 | 17 | 35684812  | ACACA    | Body    | -205.782   | 54.722  | 8.1E-06 |
| cg01999118 | 3  | 35465004  | —        | —       | 181.117    | 48.043  | 8.6E-06 |
| cg13138155 | 1  | 92950575  | GFI1     | 5'UTR   | -1,268.146 | 339.832 | 8.8E-06 |
| cg21741923 | 2  | 4274538   | —        | —       | -91.538    | 25.071  | 9.1E-06 |
| cg04390191 | 2  | 231090628 | SP110    | TSS200  | -51.041    | 13.702  | 9.2E-06 |
| cg09090353 | 11 | 67194923  | RPS6KB2  | TSS1500 | 64.876     | 17.342  | 9.5E-06 |
| cg13043696 | 10 | 1917044   | —        | —       | -35.978    | 9.907   | 9.5E-06 |
| cg22515201 | 22 | 38577827  | PLA2G6   | TSS200  | -847.118   | 220.586 | 9.7E-06 |
| cg16995791 | 1  | 59703067  | —        | —       | 26.072     | 7.025   | 9.8E-06 |

<sup>a</sup>Chromosome. <sup>b</sup>Regression coefficient from the statistical models. The covariates age, sex, PCA, smoking (pack-years), and estimated cell-type proportions were included in the models. Methylation (beta) ranged between 0 and 1 in the analyses. <sup>c</sup>Statistical significance from the statistical model.

**Table S4.** DMPs, suggestive of an association with NSCLC in nonsmokers.  
(Listed here are 19 CpGs with unadjusted  $p < 1.0E-5$ .)

| TargetIDTarget ID | Chr <sup>a</sup> | Position  | Gene ID   | Location | Beta <sup>b</sup> | Beta (SE) | Pp-value <sup>c</sup><br>(adjusted) |
|-------------------|------------------|-----------|-----------|----------|-------------------|-----------|-------------------------------------|
| ch.8.745965F      | 8                | 30420648  | RBPMS     | 3'UTR    | --530.022         | 118.417   | 2.4E-07                             |
| cg01834111        | 16               | 57085391  | NLRC5     | Body     | 99.248            | 22.487    | 2.7E-07                             |
| cg15328849        | 16               | 49623272  | ZNF423    | Body     | --39.089          | 9.049     | 1.0E-06                             |
| cg11793257        | 20               | 25218719  | .—        | .—       | 43.783            | 10.341    | 1.0E-06                             |
| cg13015171        | 12               | 102515051 | PARPBP    | 5'UTR    | 34.287            | 8.198     | 1.2E-06                             |
| cg12717745        | 14               | 61852241  | PRKCH     | Body     | --52.909          | 12.574    | 1.2E-06                             |
| cg16196595        | 1                | 156192737 | PMF1      | Body     | 30.176            | 7.091     | 1.6E-06                             |
| cg02300714        | 9                | 37800774  | DCAF10    | TSS200   | --832.535         | 202.881   | 2.1E-06                             |
| cg00550617        | 17               | 39405817  | KRTAP9-9  | Body     | --20.114          | 4.868     | 3.4E-06                             |
| cg05098732        | 19               | 46367776  | FOXA3     | 1stExon  | 55.774            | 13.776    | 3.5E-06                             |
| cg02414710        | 1                | 232650142 | SIPA1L2   | 1stExon  | --153.876         | 37.527    | 4.1E-06                             |
| cg05453127        | 14               | 50439817  | .—        | .—       | 49.111            | 11.865    | 4.4E-06                             |
| cg13910601        | 1                | 247711035 | GCSAML    | TSS1500  | 52.147            | 13.505    | 6.2E-06                             |
| cg11926456        | 2                | 211432972 | CPS1      | Body     | --25.281          | 6.389     | 6.5E-06                             |
| cg23786360        | 12               | 123487931 | PITPNM2   | Body     | --46.662          | 11.519    | 6.6E-06                             |
| cg13296912        | 1                | 24208741  | CNR2      | 5'UTR    | --206.904         | 51.616    | 7.2E-06                             |
| cg13895393        | 13               | 97928122  | MBNL2     | 5'UTR    | 277.852           | 69.824    | 7.8E-06                             |
| cg16433265        | 4                | 186741815 | SORBS2    | 5'UTR    | --64.968          | 16.297    | 8.4E-06                             |
| cg23877147        | 8                | 103897520 | AZIN1-AS1 | Body     | 321.986           | 81.947    | 9.5E-06                             |

<sup>a</sup>Chromosome. <sup>b</sup>Regression coefficient from the statistical models. The covariates age, sex, PCA, smoking (pack-years), and estimated cell-type proportions were included in the models. Methylation (beta) ranged between 0 and 1 in the analyses. <sup>c</sup>Statistical significance from the statistical model.

**Table S5.** DMPs significantly associated with smoking in patients with NSCLC.  
(Listed here are the top 30 CpGs with  $p < 7.2\text{E-}08$  after Bonferroni's correction).

| Target ID  | Chr <sup>a</sup> | Position  | Gene ID  | Location | Beta <sup>b</sup> | Beta (SE) | Pp-value <sup>c</sup> (adjusted) |
|------------|------------------|-----------|----------|----------|-------------------|-----------|----------------------------------|
| cg21566642 | 2                | 233284661 | .—       | .—       | --104.674         | 32.691    | 9.2E-18                          |
| cg17739917 | 17               | 38477572  | RARA     | 5'UTR    | --109.959         | 37.629    | 7.1E-17                          |
| cg19859270 | 3                | 98251294  | GPR15    | 1stExon  | --291.857         | 103.043   | 2.1E-16                          |
| cg18110140 | 15               | 75350380  | .—       | .—       | --105.341         | 30.213    | 7.9E-16                          |
| cg14391737 | 11               | 86513429  | PRSS23   | 5'UTR    | --70.984          | 18.954    | 2.8E-15                          |
| cg03636183 | 19               | 17000585  | F2RL3    | Body     | --65.149          | 16.567    | 6.0E-15                          |
| cg04180924 | 3                | 98272064  | .—       | .—       | --333.702         | 88.374    | 1.5E-14                          |
| cg05934812 | 5                | 334322    | AHRR     | Body     | --106.725         | 27.603    | 1.4E-13                          |
| cg01940273 | 2                | 233284934 | .—       | .—       | --76.951          | 18.926    | 2.7E-13                          |
| cg02978227 | 3                | 98292027  | .—       | .—       | --130.243         | 35.506    | 3.7E-13                          |
| cg02325951 | 14               | 89878619  | FOXN3    | Body     | 72.205            | 17.665    | 5.8E-13                          |
| cg08064403 | 3                | 98240258  | CLDND1   | Body     | --95.592          | 24.545    | 1.1E-12                          |
| cg18754985 | 3                | 98237750  | CLDND1   | Body     | --156.470         | 38.314    | 1.3E-12                          |
| cg26919182 | 1                | 202522232 | PPP1R12B | Body     | --13.713          | 3.375     | 1.8E-12                          |
| cg11643285 | 3                | 16411667  | RFTN1    | Body     | --31.382          | 7.824     | 2.2E-12                          |
| cg12607525 | 17               | 42286849  | UBTF     | Body     | 63.698            | 15.611    | 2.3E-12                          |
| cg15228509 | 1                | 243074717 | .—       | .—       | --27.236          | 6.432     | 5.2E-12                          |
| cg09516963 | 12               | 68042445  | DYRK2    | TSS200   | --19.032          | 4.187     | 6.2E-12                          |
| cg06759085 | 2                | 191555076 | NAB1     | 3'UTR    | 90.403            | 24.341    | 6.6E-12                          |
| cg04858776 | 11               | 59318494  | .—       | .—       | --78.538          | 19.401    | 9.3E-12                          |
| cg17232883 | 11               | 59318136  | .—       | .—       | --141.818         | 34.167    | 1.0E-11                          |
| cg23283320 | 21               | 48055893  | PRMT2    | 5'UTR    | --359.576         | 89.187    | 1.1E-11                          |
| cg12691488 | 1                | 243053673 | .—       | .—       | 37.159            | 8.505     | 1.2E-11                          |
| cg25304146 | 18               | 30092971  | WBP11P1  | Body     | 61.927            | 14.338    | 1.6E-11                          |
| cg06152526 | 16               | 57290525  | PLLP     | 3'UTR    | 70.146            | 16.955    | 1.7E-11                          |
| cg03218192 | 17               | 33914403  | AP2B1    | 1stExon  | --73.386          | 17.419    | 1.9E-11                          |
| cg03226871 | 2                | 128128958 | .—       | .—       | 44.857            | 10.064    | 2.5E-11                          |
| cg03626220 | 16               | 71052200  | HYDIN    | Body     | 46.804            | 10.836    | 2.6E-11                          |
| cg16021537 | 2                | 161349986 | RBMS1    | 1stExon  | --111.382         | 26.939    | 2.8E-11                          |
| cg06513015 | 7                | 64459246  | ERV3-1   | 5'UTR    | --33.465          | 7.795     | 2.8E-11                          |

<sup>a</sup>Chromosome. Regression coefficient from the statistical models. The covariates age, sex, PCA, smoking (pack-years), and estimated cell-type proportions were included in the models. Methylation (beta) ranged between 0 and 1 in the analyses. <sup>c</sup>Statistical significance from the statistical model.

**Table S6.** DMPs significantly associated with smoking in control subjects.  
(Listed here are the top 30 CpGs with  $p < 7.2\text{E-}08$  after Bonferroni's correction).

| Target ID  | Chr <sup>a</sup> | Position  | Gene ID   | Location | Beta <sup>b</sup> | Beta (SE) | <i>p</i> -value <sup>c</sup> (adjusted) |
|------------|------------------|-----------|-----------|----------|-------------------|-----------|-----------------------------------------|
| cg04322608 | 11               | 17392359  | NCR3LG1   | Body     | 65.941            | 15.732    | 2.5E-11                                 |
| cg22266749 | 4                | 110223959 | COL25A1   | TSS200   | 50.586            | 12.345    | 1.6E-10                                 |
| cg16021537 | 2                | 161349986 | RBMS1     | 1stExon  | -109.289          | 28.632    | 1.9E-10                                 |
| cg06513015 | 7                | 64459246  | ERV3-1    | 5'UTR    | -37.561           | 10.024    | 2.3E-10                                 |
| cg04946709 | 16               | 59789030  | LOC644649 | Body     | 54.463            | 14.027    | 2.4E-10                                 |
| cg09516963 | 12               | 68042445  | DYRK2     | TSS200   | -20.358           | 5.175     | 3.9E-10                                 |
| cg10546176 | 5                | 34929404  | DNAJC21   | TSS1500  | -200.599          | 51.693    | 4.2E-10                                 |
| cg03618918 | 1                | 160865097 | —         | —        | 39.608            | 9.706     | 7.2E-10                                 |
| cg20262915 | 2                | 191524489 | NAB1      | Body     | 53.828            | 13.307    | 7.6E-10                                 |
| cg15228509 | 1                | 243074717 | —         | —        | -26.545           | 6.572     | 8.5E-10                                 |
| cg26919182 | 1                | 202522232 | PPP1R12B  | Body     | -11.553           | 2.772     | 9.4E-10                                 |
| cg11984238 | 14               | 88965446  | PTPN21    | Body     | -108.748          | 27.704    | 1.1E-09                                 |
| cg12052203 | 11               | 66115045  | B3GNT1    | 1stExon  | 29.707            | 6.875     | 1.2E-09                                 |
| cg03226871 | 2                | 128128958 | —         | —        | 46.551            | 11.520    | 1.2E-09                                 |
| cg11643285 | 3                | 16411667  | RFTN1     | Body     | -24.991           | 5.886     | 1.3E-09                                 |
| cg10739556 | 7                | 27192056  | —         | —        | -117.474          | 29.665    | 1.5E-09                                 |
| cg17232883 | 11               | 59318136  | —         | —        | -122.665          | 30.678    | 2.0E-09                                 |
| cg10292832 | 1                | 26798740  | HMG2      | TSS200   | -126.620          | 30.577    | 2.0E-09                                 |
| cg14030268 | 10               | 119135296 | PDZD8     | TSS1500  | -837.031          | 240.800   | 2.1E-09                                 |
| cg02325951 | 14               | 89878619  | FOXN3     | Body     | 54.972            | 14.030    | 2.2E-09                                 |
| cg12691488 | 1                | 243053673 | —         | —        | 34.551            | 8.680     | 3.1E-09                                 |
| cg25849844 | 5                | 164386021 | —         | —        | 206.729           | 57.117    | 3.1E-09                                 |
| cg11050859 | 8                | 60031823  | TOX       | TSS200   | -115.158          | 29.343    | 3.2E-09                                 |
| cg19388739 | 19               | 3581993   | —         | —        | 136.665           | 36.582    | 3.3E-09                                 |
| cg01276128 | 19               | 39138334  | ACTN4     | 5'UTR    | -365.038          | 94.212    | 4.1E-09                                 |
| cg05575921 | 5                | 373378    | AHRR      | Body     | -20.761           | 4.774     | 4.6E-09                                 |
| cg25429619 | 1                | 174846521 | RABGAP1L  | 5'UTR    | 35.506            | 9.444     | 5.6E-09                                 |
| cg14095048 | 22               | 25342876  | .         | .        | 91.063            | 22.136    | 5.7E-09                                 |
| cg04224661 | 11               | 123375288 | —         | —        | 69.038            | 17.376    | 6.0E-09                                 |
| cg22108930 | 7                | 111800870 | DOCK4     | Body     | -78.791           | 20.691    | 6.9E-09                                 |

<sup>a</sup>Chromosome. <sup>b</sup>Regression coefficient from the statistical models. The covariates age, sex, PCA, smoking (pack-years), and estimated cell-type proportions were included in the models. Methylation (beta) ranged between 0 and 1 in the analyses. <sup>c</sup>Statistical significance from the statistical model.

**Table S7.** DMPs, suggestive of an association with stage I NSCLC.  
(Listed here are 15 CpGs with unadjusted  $p < 1.0E-5$ )

| Target ID  | Chr <sup>a</sup> | Position  | Gene         | Location | Beta <sup>b</sup> | Beta (SE) | <i>p</i> -value <sup>c</sup> |
|------------|------------------|-----------|--------------|----------|-------------------|-----------|------------------------------|
| cg08135765 | 4                | 6996753   | TBC1D14      | Body     | -225.3            | 49.5      | 3.1E-07                      |
| cg00389714 | 12               | 58731100  | —            | —        | -29.7             | 7.0       | 1.3E-06                      |
| cg17324327 | 7                | 43622228  | STK17A       | TSS1500  | -650.9            | 155.8     | 2.2E-06                      |
| cg09171428 | 22               | 44584443  | PARVG        | Body     | 75.4              | 18.5      | 2.4E-06                      |
| cg21808045 | 17               | 75463984  | SEPT9        | Body     | 38.5              | 9.4       | 2.9E-06                      |
| cg05860195 | 16               | 89324033  | —            | —        | -38.9             | 9.7       | 3.2E-06                      |
| cg12561658 | 12               | 126579383 | LOC101927464 | TSS1500  | 20.9              | 5.1       | 3.5E-06                      |
| cg06640763 | 7                | 149473097 | SSPO         | TSS200   | 172.5             | 41.5      | 5.1E-06                      |
| cg26600802 | 10               | 115939115 | TDRD1        | 5'UTR    | -35.9             | 8.5       | 5.2E-06                      |
| cg06015439 | 12               | 91669322  | —            | —        | 34.8              | 8.6       | 6.6E-06                      |
| cg05047465 | 10               | 27793441  | RAB18        | Body     | 440.6             | 108.2     | 8.6E-06                      |
| cg02238928 | 20               | 55837591  | BMP7         | Body     | 20.1              | 4.9       | 9.7E-06                      |
| cg16391151 | 7                | 30518197  | NOD1         | 5'UTR    | -938.9            | 234.8     | 9.8E-06                      |
| cg18375700 | 17               | 42975879  | CCDC103      | TSS1500  | 49.5              | 12.9      | 9.9E-06                      |
| cg09876271 | 14               | 55595895  | LGALS3       | TSS200   | -305.5            | 75.8      | 1.0E-05                      |

<sup>a</sup>Chromosome.

<sup>b</sup>Regression coefficient from the statistical models. The covariates age, sex, PCA, smoking (pack-years), and estimated cell-type proportions were included in the models. Methylation (beta) ranged between 0 and 1 in the analyses.

<sup>c</sup>Statistical significance from the statistical model.
