# Supplementary material for: Epigenome-Wide Association Analysis of Differentially Methylated Signals in Blood Samples of Patients with Non-Small-Cell Lung Cancer
Source: MDPI journal article supplement (doi:10.3390/jcm8091307), 2019-08-25

## Supplement Figure S1. Epigenome-wide association plot associated with non small cell lung cancer

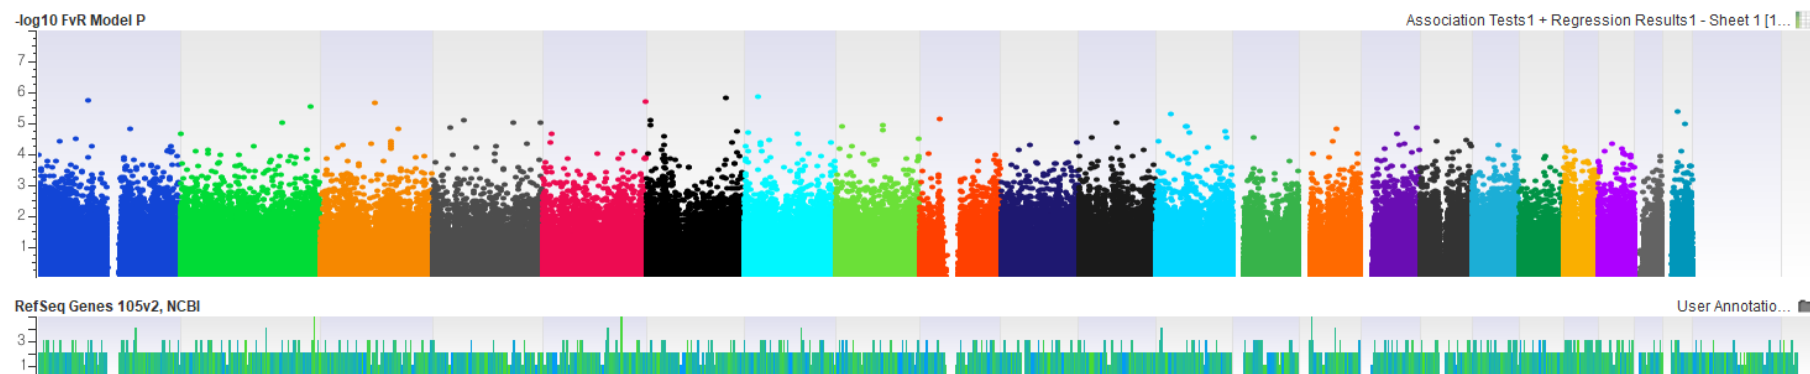

Non small cell lung cancer vs Control

Adjusted for age, sex, smoke (pack years), blood cell type, PCA

**Supplement Figure S2. Epigenome-wide association plot associated with non small cell lung cancer in group of non-smokers**

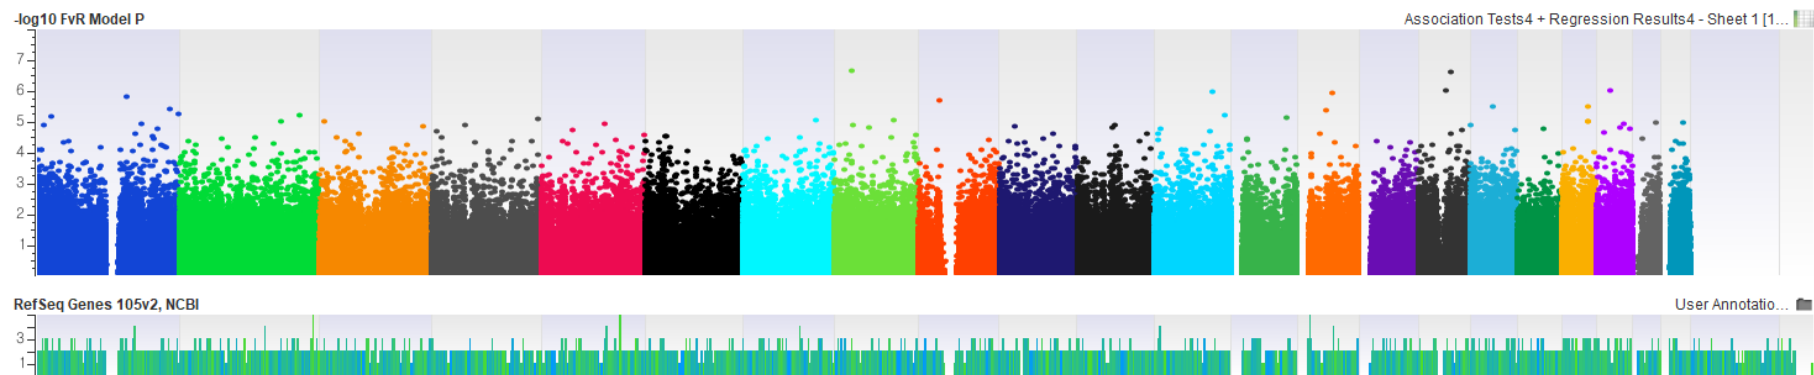

Non small cell lung cancer vs Control in non-smokers  
Adjusted for age, sex, smoke (pack years), blood cell type, PCA

**Supplement Figure S3. Epigenome-wide association plot associated with smoking in groups of non small cell lung cancer**

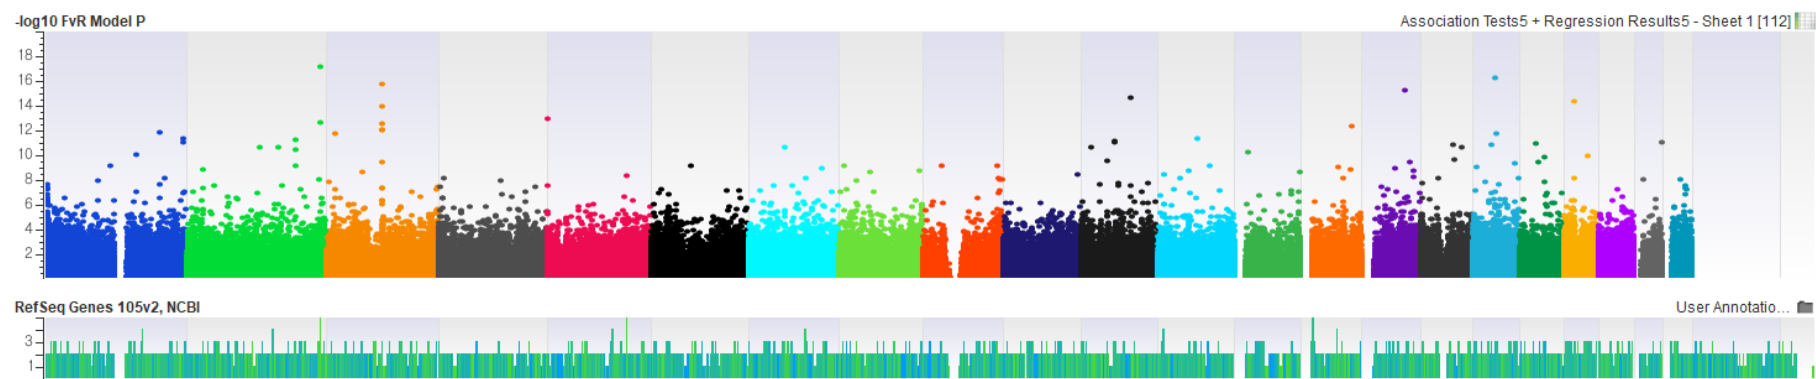

Current smokers vs non-smokers in patients with non small cell lung cancer

Adjusted for age, sex, smoke (pack years), blood cell type, PCA

**Supplement Figure S4. Epigenome-wide association plot associated with smoking in control subjects.**

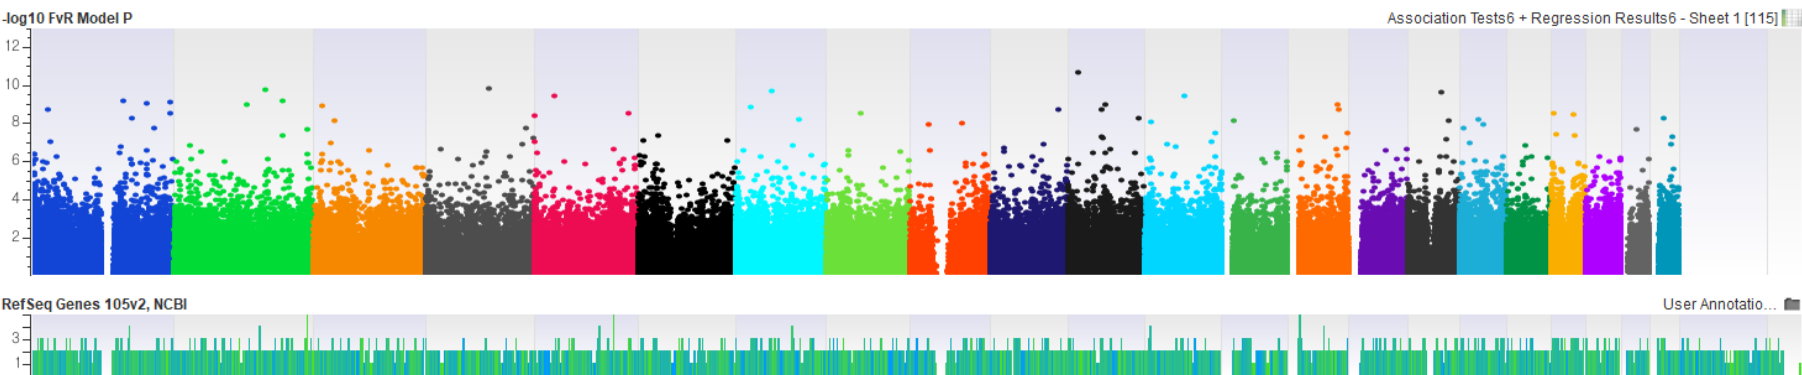

Current smokers vs non-smokers in control  
Adjusted for age, sex, smoke (pack years), blood cell type, PCA

Supplement Figure S5. Correlation of IMP3 methylation with expression in The Cancer Genome Atlas (TCGA) data.

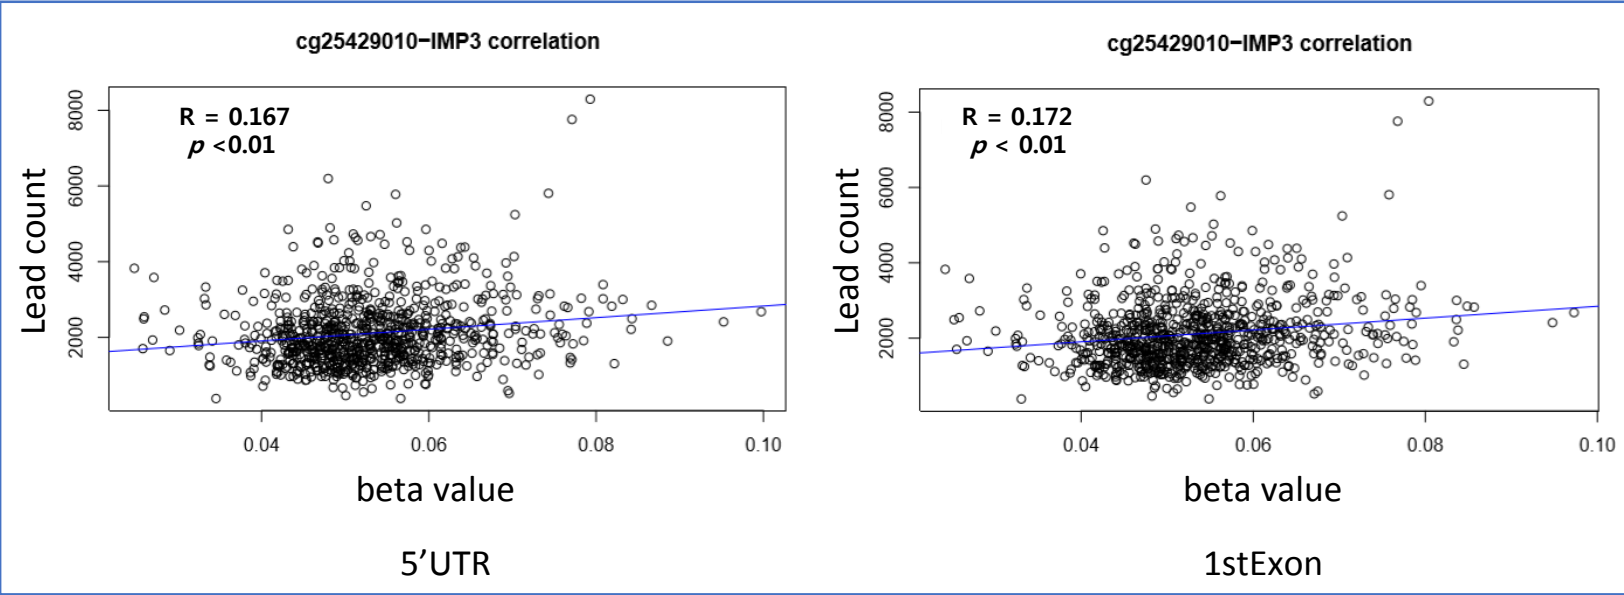

Supplement Figure S6. Correlation of FAM113B methylation with expression in The Cancer Genome Atlas (TCGA) data.

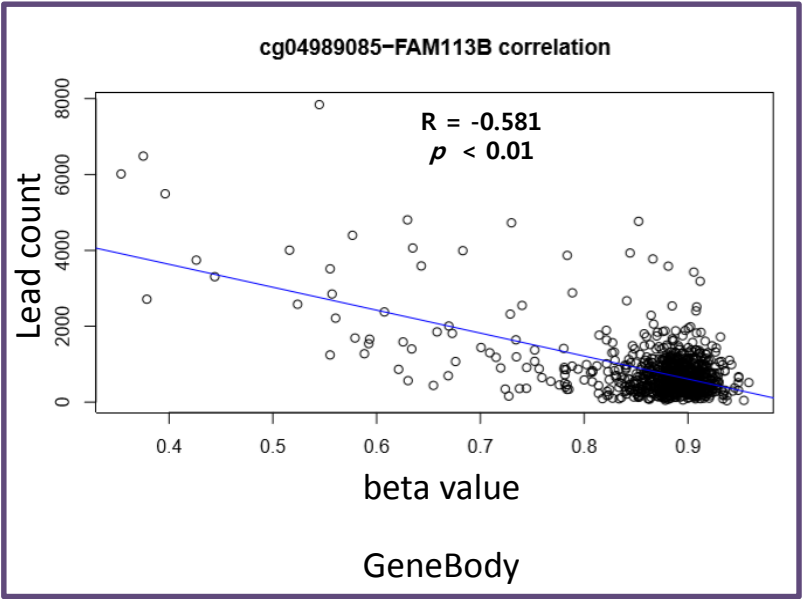

Supplement: s1 [file s1]
